# Supplementary material for: The bHLH transcription factor VfTT8 underlies zt2, the locus determining zero tannin content in faba bean (Vicia faba L.)
Source: PubMed Central journal article supplement (PMC7459296; doi:10.1038/s41598-020-71070-2), 2020-08-31
Supplement: 41598_2020_71070_MOESM1_ESM.pdf [file 41598_2020_71070_MOESM1_ESM.pdf]

**The bHLH transcription factor VfTT8 underlies *zt2*, the locus determining zero tannin content in faba bean (*Vicia faba* L.)**

Natalia Gutierrez<sup>1\*</sup>, CM Avila<sup>1</sup>, Ana M. Torres<sup>1</sup>

<sup>1</sup> Área de Genómica y Biotecnología, IFAPA-Centro Alameda del Obispo, Apdo 3092, E-14080 Córdoba, Spain.

\*Corresponding author e-mail: [natalia.gutierrez.leiva@juntadeandalucia.es](mailto:natalia.gutierrez.leiva@juntadeandalucia.es)

**Supplementary Table S1. Molecular markers surveyed in faba bean, derived from the syntenic *zt2* region (Medtr1g040675-Medtr1g087900).** The table shows the name given to each marker, the corresponding Medicago locus in NCBI, the gene description, the orthologous locus in faba bean (after BLASTing against the in-house faba bean transcriptome), the genotyping technique used and the result after sequence analysis and genotyping in three segregating populations.

| Name                             | Medicago locus NCBI | Gene description                                       | BLASTn_VF_Transcriptome (Ocaña et al. 2016)             | Genotyping technique | Sequence analysis              | Markers mapped in M x D* | Markers mapped in W x D* | Markers mapped in 6 x ZT2* |
|----------------------------------|---------------------|--------------------------------------------------------|---------------------------------------------------------|----------------------|--------------------------------|--------------------------|--------------------------|----------------------------|
| PISGEN_8_1_1*                    | MTR_1g040675        | Auxin response factor                                  | -                                                       | ER digestion         | Monomorphic                    | -                        | -                        | -                          |
| <b>Vf_Mt1g043080<sup>b</sup></b> | MTR_1g043080        | MYB relation transcription (MYB)                       | Contig15498                                             | ER digestion         | ER not available               | -                        | -                        | -                          |
| Vf_Mt1g044570 <sup>c</sup>       | MTR_1g044570        | CAX-interacting protein                                | -                                                       | KASPAR assay         | Polymorphic                    | -                        | -                        | X                          |
| <b>Vf_Mt1g045610<sup>b</sup></b> | MTR_1g045610        | R2R3-MYB Transcription factor                          | No hits found                                           | ALP                  | Polymorphic                    | X                        | X                        | X                          |
| Vf_Mt1g045800 <sup>c</sup>       | MTR_1g045800        | G3BP-like protein                                      | -                                                       | KASPAR assay         | Monomorphic                    | X                        | -                        | -                          |
| mtml_GEN_01090_01_1              | MTR_1g050520        | Protein kinase and PP2C-like domain-containing protein | -                                                       | ER digestion         | Monomorphic                    | -                        | -                        | -                          |
| Vf_Mt1g050730 <sup>c</sup>       | MTR_1g050730        | Pre-mRNA-processing ATP-dependent RNA helicase prp5    | -                                                       | KASPAR assay         | Polymorphic                    | -                        | X                        | -                          |
| Vf_Mt1g056180 <sup>c</sup>       | MTR_1g056180        | uncharacterized LOC11431185                            | -                                                       | KASPAR assay         | Polymorphic                    | X                        | -                        | -                          |
| cgP137FSNP <sup>c</sup>          | MTR_1g056180        | uncharacterized LOC11431185                            | -                                                       | KASPAR assay         | Polymorphic                    | -                        | -                        | X                          |
| Vf_Mt1g061800 <sup>c</sup>       | MTR_1g061800        | Threonine dehydratase biosynthetic, chloroplastic      | -                                                       | KASPAR assay         | Monomorphic                    | -                        | -                        | -                          |
| Vf_Mt1g064060 <sup>c</sup>       | MTR_1g064060        | Adenosine kinase 2                                     | -                                                       | KASPAR assay         | Monomorphic                    | -                        | -                        | -                          |
| PTSS4 <sup>c</sup>               | MTR_1g069105        | 26S proteasome regulatory subunit 4 homolog A          | -                                                       | ER digestion         | Polymorphic                    | -                        | -                        | X (MaI)                    |
| <b>Vf_Mt1g070180<sup>b</sup></b> | MTR_1g070180        | bHLH transcription factor                              | Lucus_34012_Transcript_1/1_Confidence_1_000_Length_809  | ER digestion         | Monomorphic                    | -                        | -                        | -                          |
| <b>Vf_Mt1g070455<sup>b</sup></b> | MTR_1g070455        | WRKY family transcription factor                       | Lucus_48067_Transcript_1/1_Confidence_1_000_Length_887  | ER digestion         | Monomorphic                    | -                        | -                        | -                          |
| <b>Vf_Mt1g070870<sup>b</sup></b> | MTR_1g070870        | bHLH transcription factor                              | Contig4759                                              | ER digestion         | Monomorphic                    | -                        | -                        | -                          |
| Vf_Mt1g071110 <sup>c</sup>       | MTR_1g071110        | 2-methyl-6-phytyl-1,4-hydroquinone methyltransferase,  | -                                                       | KASPAR assay         | Polymorphic                    | -                        | -                        | X                          |
| GLIP245SNP <sup>c</sup>          | MTR_1g071430        | Protein LIFEGUARD 4                                    | -                                                       | KASPAR assay         | Polymorphic                    | X                        | X                        | X                          |
| PISGEN_25-2-3-1*                 | MTR_1g071610        | Acetyl-CoA carboxylase, putative                       | -                                                       | ER digestion         | Monomorphic                    | -                        | -                        | -                          |
| <b>Vf_Mt1g072130<sup>b</sup></b> | MTR_1g072130        | PHDfingerprotein, putative                             | Lucus_31961                                             | ER digestion         | Monomorphic                    | -                        | -                        | -                          |
| <b>Vf_Mt1g072140<sup>b</sup></b> | MTR_1g072140        | Transducin/WD40 repeat protein                         | No hits found                                           | ER digestion         | Polymorphic                    | X (SgrAI)                | -                        | X (PfeI)                   |
| <b>Vf_Mt1g072320<sup>b</sup></b> | MTR_1g072320        | Transcription factor bHLH (TT18)                       | No hits found                                           | ER digestion         | Polymorphic                    | X (Eco130I/TasI)         | X (DraI)                 | X (DraI/RsaI)              |
| <b>Vf_Mt1g072530<sup>b</sup></b> | MTR_1g072530        | Transcription factor bHLH66                            | Lucus_21144                                             | ER digestion         | Polymorphic                    | X (NdeI)                 | X (SmaI)                 | X (Tetra-arm)              |
| Vf_Mt1g072640 <sup>c</sup>       | MTR_1g072640        | Protein PALECRESS, chloroplastic                       | -                                                       | KASPAR assay         | Monomorphic                    | -                        | -                        | -                          |
| Vf_Mt1g072740 <sup>c</sup>       | MTR_1g072740        | Pre-mRNA-processing factor 17                          | -                                                       | KASPAR assay         | Polymorphic                    | X                        | -                        | -                          |
| Vf_Mt1g073000 <sup>c</sup>       | MTR_1g073000        | Polyadenylate-binding protein 1                        | -                                                       | KASPAR assay         | Monomorphic                    | -                        | -                        | -                          |
| <b>Vf_Mt1g073170<sup>b</sup></b> | MTR_1g073170        | MYB related transcription factor                       | Lucus_29372                                             | ER digestion         | Monomorphic                    | -                        | -                        | -                          |
| <b>Vf_Mt1g073920<sup>b</sup></b> | MTR_1g073920        | Actin related rprotein ARP4                            | Contig21805                                             | ER digestion         | ER not available               | -                        | -                        | -                          |
| <b>Vf_Mt1g074370<sup>b</sup></b> | MTR_1g074370        | Ethylene-responsive transcription factor               | Contig5707                                              | ER digestion         | Unreliable data for genotyping | -                        | -                        | -                          |
| Vf_Mt1g075140 <sup>c</sup>       | MTR_1g075140        | DNA-directed RNA polymerase II subunit RPB7            | -                                                       | KASPAR assay         | Monomorphic                    | -                        | -                        | -                          |
| <b>Vf_Mt1g075320<sup>b</sup></b> | MTR_1g075320        | N-carbamyl-L-amino acid amidohydrolase                 | Lucus_2084_Transcript 2180                              | ER digestion         | Monomorphic                    | -                        | -                        | -                          |
| Vf_Mt1g075610 <sup>c</sup>       | MTR_1g075610        | Cell division control protein 2 homolog D              | -                                                       | KASPAR assay         | Monomorphic                    | -                        | -                        | -                          |
| <b>Vf_Mt1g075740<sup>b</sup></b> | MTR_1g075740        | COPI-interacting-like protein                          | Contig16561                                             | ER digestion         | ER not available               | -                        | -                        | -                          |
| <b>Vf_Mt1g076150<sup>b</sup></b> | MTR_1g076150        | MYB related transcription factor                       | No hits found                                           | ER digestion         | Monomorphic                    | -                        | -                        | -                          |
| <b>Vf_Mt1g076600<sup>b</sup></b> | MTR_1g076600        | Cyclin-D-binding Myb-like transcription factor         | Lucus_12353_Transcript_2/3_Confidence_0_600_Length_1242 | ER digestion         | Monomorphic                    | -                        | -                        | -                          |
| <b>Vf_Mt1g076780<sup>b</sup></b> | MTR_1g076780        | WD40 repeat protein                                    | Contig15218                                             | ER digestion         | Unreliable data for genotyping | -                        | -                        | -                          |
| <b>Vf_Mt1g077640<sup>b</sup></b> | MTR_1g077640        | bHLH transcription factor                              | No hits found                                           | ER digestion         | Polymorphic                    | -                        | -                        | X (BamHI)                  |
| GLP5NP <sup>c</sup>              | MTR_1g079490        | Germin-like protein subfamily 1 member 16              | -                                                       | KASPAR assay         | Polymorphic                    | X                        | X                        | X                          |
| Vf_Mt1g079520 <sup>c</sup>       | MTR_1g079520        | LRR receptor-like kinase                               | -                                                       | KASPAR assay         | Monomorphic                    | -                        | -                        | -                          |
| Vf_Mt1g079870 <sup>c</sup>       | MTR_1g079870        | Hypothetical protein                                   | -                                                       | KASPAR assay         | Polymorphic                    | X                        | -                        | -                          |
| Vf_Mt1g079930 <sup>c</sup>       | MTR_1g079930        | Activating signal cointegrator                         | -                                                       | KASPAR assay         | Monomorphic                    | -                        | -                        | -                          |
| Vf_Mt1g080150 <sup>c</sup>       | MTR_1g080150        | RNA-binding protein 42                                 | -                                                       | KASPAR assay         | Monomorphic                    | -                        | -                        | -                          |
| Vf_Mt1g081290 <sup>c</sup>       | MTR_1g081290        | Zeta-carotene desaturase                               | -                                                       | KASPAR assay         | Monomorphic                    | -                        | -                        | -                          |
| Vf_Mt1g082210 <sup>c</sup>       | MTR_1g082210        | Gibberellin receptor GID1c-like protein                | -                                                       | KASPAR assay         | Polymorphic                    | -                        | X                        | X                          |
| Vf_Mt1g082420 <sup>c</sup>       | MTR_1g082420        | Thylakoid lumen 18.3 kDa protein                       | -                                                       | KASPAR assay         | Polymorphic                    | X                        | -                        | -                          |
| <b>Vf_Mt1g082480<sup>b</sup></b> | MTR_1g082480        | bHLH transcription factor                              | No hits found                                           | ER digestion         | Unreliable data for genotyping | -                        | -                        | -                          |
| Vf_Mt1g082580 <sup>c</sup>       | MTR_1g082580        | Serine/Threonine kinase family protein                 | -                                                       | KASPAR assay         | Polymorphic                    | -                        | -                        | X                          |
| Vf_Mt1g083230 <sup>c</sup>       | MTR_1g083230        | WD repeat phosphoinositide-interacting-like protein    | -                                                       | KASPAR assay         | Monomorphic                    | -                        | -                        | -                          |
| Vf_Mt1g083450 <sup>c</sup>       | MTR_1g083450        | Hypothetical protein                                   | -                                                       | KASPAR assay         | Monomorphic                    | -                        | -                        | -                          |
| Vf_Mt1g083460 <sup>c</sup>       | MTR_1g083460        | 60S ribosomal protein L18-3                            | -                                                       | KASPAR assay         | Polymorphic                    | X                        | X                        | -                          |
| Vf_Mt1g083960 <sup>c</sup>       | MTR_1g083960        | Calreticulin                                           | -                                                       | KASPAR assay         | Monomorphic                    | -                        | -                        | -                          |
| <b>Vf_Mt1g084160<sup>b</sup></b> | MTR_1g084160        | bHLH transcription factor                              | Contig23306                                             | ER digestion         | Unreliable data for genotyping | -                        | -                        | -                          |
| Vf_Mt1g085040 <sup>c</sup>       | MTR_1g085040        | MYB transcription factor                               | -                                                       | KASPAR assay         | Polymorphic                    | X                        | X                        | -                          |
| <b>Vf_Mt1g086180<sup>b</sup></b> | MTR_1g086180        | MYB related transcription factor                       | Contig1005                                              | ER digestion         | Unreliable data for genotyping | -                        | -                        | -                          |
| GLIP133SNP <sup>c</sup>          | MTR_1g086340        | Polyketide cyclase/dehydrase and lipid transporter     | -                                                       | KASPAR assay         | Monomorphic                    | -                        | -                        | -                          |
| <b>Vf_Mt1g086790<sup>b</sup></b> | MTR_1g086790        | WRKY family transcription factor                       | Lucus_9490_Transcript_1/1_Confidence_1_000_Length_898   | ER digestion         | ER not available               | -                        | -                        | -                          |
| Vf_Mt1g086810 <sup>c</sup>       | MTR_1g086810        | Heme-binding protein                                   | -                                                       | KASPAR assay         | Monomorphic                    | -                        | -                        | -                          |
| <b>Vf_Mt1g087120<sup>b</sup></b> | MTR_1g087120        | MYB related transcription factor                       | Lucus_40110_Transcript_1/1_Confidence_1_000_Length_274  | ER digestion         | Unreliable data for genotyping | -                        | -                        | -                          |
| LG031SNP <sup>c</sup>            | MTR_1g087760        | Kynurenine-oxoglutarate transaminase-like protein      | -                                                       | KASPAR assay         | Monomorphic                    | -                        | -                        | -                          |
| LG038SNP <sup>c</sup>            | MTR_1g087900        | Fumarate hydratase                                     | -                                                       | KASPAR assay         | Polymorphic                    | X                        | -                        | -                          |
| Vf_Mt1g088190 <sup>c</sup>       | MTR_1g088190        | Endoglucanase 17                                       | -                                                       | KASPAR assay         | Polymorphic                    | X                        | X                        | -                          |
| Vf_Mt1g089980 <sup>c</sup>       | MTR_1g089980        | No hit found                                           | -                                                       | KASPAR assay         | Polymorphic                    | X                        | -                        | -                          |
| Vf_Mt1g114560 <sup>c</sup>       | MTR_1g114560        | Riboflavin kinase                                      | -                                                       | KASPAR assay         | Monomorphic                    | -                        | -                        | -                          |
| Vf_Mt1g116110 <sup>c</sup>       | MTR_1g116110        | Prototheme IX farnesyltransferase                      | -                                                       | KASPAR assay         | Polymorphic                    | -                        | X                        | -                          |
| Vf_Mt1g116230 <sup>c</sup>       | MTR_1g116230        | Leukotriene A4 hydrolase-like protein                  | -                                                       | KASPAR assay         | Monomorphic                    | -                        | -                        | -                          |
| Vf_Mt1g116810 <sup>c</sup>       | MTR_1g116810        | Prolyl 4-hydroxylase alpha-like protein                | -                                                       | KASPAR assay         | Monomorphic                    | -                        | -                        | -                          |
| GLIP065 <sup>c</sup>             | MTR_4g021350        | Medicago truncatula clone mth2-14c14                   | -                                                       | ER digestion         | Polymorphic                    | -                        | -                        | X (AclI)                   |
| Vf_Mt4g080370 <sup>c</sup>       | MTR_4g080370        | No results NCBI                                        | -                                                       | KASPAR assay         | Polymorphic                    | X                        | X                        | -                          |
| Vf_Mt5g042440 <sup>c</sup>       | MTR_5g042440        | LysM-domain receptor-like kinase                       | -                                                       | KASPAR assay         | Polymorphic                    | X                        | -                        | -                          |
| GLIP651 <sup>c</sup>             | MTR_5g085850        | NRT1/ PTR FAMILY                                       | -                                                       | ER digestion         | Monomorphic                    | -                        | -                        | -                          |
| Vf_Mt7g035110 <sup>c</sup>       | MTR_7g035110        | RXT3-like protein                                      | -                                                       | KASPAR assay         | Polymorphic                    | X                        | -                        | -                          |
| Vf_Mt7g100500 <sup>c</sup>       | MTR_7g100500        | Serine/threonine protein kinase PBS1                   | -                                                       | KASPAR assay         | Polymorphic                    | X                        | X                        | X                          |
| REP5NP <sup>c</sup>              | MTR_8g068875        | Medicago truncatula protein RAE1                       | -                                                       | KASPAR assay         | Monomorphic                    | -                        | -                        | -                          |

\*Restriction Enzymes used for genotyping are between brackets

<sup>a</sup> EST (Ellwood et al. 2008; Satovic et al. 2013)

<sup>b</sup> New gene-based markers developed in this study (in bold)

<sup>c</sup> KASPar markers (Webb et al. 2016)

**The bHLH transcription factor VfTT8 underlies *zt2*, the locus determining zero tannin content in faba bean (*Vicia faba* L.)**

Natalia Gutierrez<sup>1\*</sup>, CM Avila<sup>1</sup>, Ana M. Torres<sup>1</sup>

<sup>1</sup> Área de Genómica y Biotecnología, IFAPA-Centro Alameda del Obispo, Apdo 3092, E-14080 Córdoba, Spain.

\*Corresponding author e-mail: [natalia.gutierrez.leiva@juntadeandalucia.es](mailto:natalia.gutierrez.leiva@juntadeandalucia.es)

**Supplementary Table S2. Characteristics of the 23 *Medicago truncatula* markers associated with anthocyanin expression and designed in this study.** The information about marker name and type, gene description, orthologous sequence in faba bean, primer sequence, annealing temperature, locus name and product size of the amplicon is shown.

| Marker name   | Marker type | Medicago locus | Gene description                               | BLASTn_Vf_Transcriptome (Ocaña et al. 2016)             | Primer Sequence (5'-3')                                  | Ta   | PCR product size (bp) |
|---------------|-------------|----------------|------------------------------------------------|---------------------------------------------------------|----------------------------------------------------------|------|-----------------------|
| Vf_Mt1g043080 | SNP         | MTR_1g043080   | MYB relation transcription (MYB)               | Contig15498                                             | TAGGGAACAGGTGGTCAGCA<br>TGCACCCTTCACTTGTGTA              | 55°C | 667                   |
| Vf_Mt1g045610 | ALP         | MTR_1g045610   | R2R3-MYB Transcription factor                  | No hits found                                           | TGGACTGCTGAAGAGGATAGGTT<br>ATTATGCTTTCTCTTGTGGTGTTA      | 57°C | 719 (Vf6)/ 574 (zt2)  |
| Vf_Mt1g070180 | SNP         | MTR_1g070180   | bHLH transcription factor                      | Locus_34012_Transcript_1/1_Confidence_1.000_Length_809  | CCAAAGCATAACTAAGCATGCTGAT<br>TCCATTGCCCACTTGAACCC        | 60°C | 201                   |
| Vf_Mt1g070455 | SNP         | MTR_1g070455   | WRKY family transcription factor               | Locus_48067_Transcript_1/1_Confidence_1.000_Length_887  | CGTGGAGGAAGTACGGGCA<br>CAAGCACCTCTCGACATGCTTC            | 58°C | 550                   |
| Vf_Mt1g070870 | SNP         | MTR_1g070870   | bHLH transcription factor                      | Contig4759                                              | GAGCTGCCATGTTGGATGAATTG<br>GGATATCCAGTTACCAGTGGGGC       | 60°C | 336                   |
| Vf_Mt1g072130 | SNP         | MTR_1g072130   | PHDfingerprotein,putative                      | Locus_31961                                             | TTCTAGATCCAATGGTCGTAGTGT<br>CCTTGTGTCACTGCTCATTGTG       | 54°C | 639                   |
| Vf_Mt1g072140 | SNP         | MTR_1g072140   | transducin/WD40 repeatprotein                  | No hits found                                           | TGCGTCAAAATCTCCAACGA<br>AGAGTAGCAACAGTATAAATTTCCC        | 54°C | 554                   |
| Vf_Mt1g072320 | SNP         | MTR_1g072320   | Transcription factor TT8                       | No hits found                                           | GTTGCCAGGAAGGCATATGC<br>CTTATCAGTTGTGCCAATCTCAACG        | 57°C | 690 <sup>(1)</sup>    |
| Vf_Mt1g072530 | SNP         | MTR_1g072530   | Transcription factor bHLH66                    | Locus_21144                                             | AAGAAGCACACACTACTCTCAAAC<br>TCAATCTCCAACAAGCATCACTC      | 57°C | 670 <sup>(2)</sup>    |
| Vf_Mt1g072530 | SNP         | MTR_1g072530   | Transcription factor bHLH66                    | Locus_21144                                             | TGCAACATGGCAAAGTATTGCA<br>ACTAGTGGTATAGCATTGAGTCA        | 60°C | 615                   |
| Vf_Mt1g073170 | SNP         | MTR_1g073170   | MYB related transcription factor               | Locus_29372                                             | CAGGACTGAGAAGAAATGGGAAAG<br>CATCAAGCAACAAAGTCTATGATCCC   | 58°C | 493                   |
| Vf_Mt1g073920 | SNP         | MTR_1g073920   | Actin related rprotein ARP4                    | Contig21805                                             | GAGGGGCAACTTGTATGCTGT<br>TCTTCAACTGCAGAACTAAACCA         | 56°C | 800                   |
| Vf_Mt1g074370 | SNP         | MTR_1g074370   | Ethylene-responsive transcription factor       | Contig5707                                              | GAATTCAACTATCTCCCCTTCAACG<br>CGGAAGCATCAACAATTGTTCCA     | 60°C | 568                   |
| Vf_Mt1g075320 | SNP         | MTR_1g075320   | N-carbamyl-L-amino acid amidohydrolase         | Locus_2084_Transcript_2180                              | CGCTTATTGGCTGGGAGTGA<br>GCTAGGGATACTATTGATTGCTCCA        | 60°C | 820                   |
| Vf_Mt1g075740 | SNP         | MTR_1g075740   | COP1-interacting-like protein                  | Contig16561                                             | GAGGTTGGATTCGGCTGTTTTTC<br>CCACCC TTGTCATCTGATCTT        | 56°C | 668                   |
| Vf_Mt1g076150 | SNP         | MTR_1g076150   | MYB related transcription factor               | No hits found                                           | GAGCTCCTTGTGTGAAAAGATGG<br>CTGCAGCTTTTCCACACCTTAAC       | 54°C | 320                   |
| Vf_Mt1g076600 | SNP         | MTR_1g076600   | cyclin-D-binding Myb-like transcription factor | Locus_12353_Transcript_2/3_Confidence_0.600_Length_1242 | GATGACTTCGCTTGATAGGTGC<br>GCATCGGCATCCCACC               | 60°C | 352                   |
| Vf_Mt1g076780 | SNP         | MTR_1g076780   | WD-40 repeat protein                           | Contig15218                                             | GGGGAACTTGCATTTGACATTG<br>CCACATCTGTAGCCAGTATCCGAG       | 64°C | 720                   |
| Vf_Mt1g077640 | SNP         | MTR_1g077640   | bHLH transcription factor                      | No hits found                                           | GTGTAGCATCGATTCTTTGTAGAC<br>AATTATGTCGACTATCTCAAGGAAGAA  | 56°C | 477                   |
| Vf_Mt1g082480 | SNP         | MTR_1g082480   | bHLH transcription factor                      | No hits found                                           | GAAATTGAGAATCAGAGAATGACTCAC<br>GAATACTGTGAAATGTAAGAAGTCA | 56°C | 503                   |
| Vf_Mt1g084160 | SNP         | MTR_1g084160   | bHLH transcription factor                      | Contig23306                                             | CTCTCTCTCTTCTTCTCTCTCA<br>CGGATTAGATCTCCACCCG            | 56°C | 584                   |
| Vf_Mt1g086180 | SNP         | MTR_1g086180   | MYB related transcription factor               | Contig1005                                              | TCTCATGATTCATGTGGCCCTTCT<br>CAAGCATAAGGATTACGCAAGGTCA    | 56°C | 452                   |
| Vf_Mt1g086790 | SNP         | MTR_1g086790   | WRKY family transcription factor               | Locus_9490_Transcript_1/1_Confidence_1.000_Length_898   | CAGAGAGAACCAGATTTCGCGTT<br>CCCTAAGAAAGGAGTAGTTGTCCC      | 56°C | 333                   |
| Vf_Mt1g087120 | SNP         | MTR_1g087120   | MYB related transcription factor               | Locus_40110_Transcript_1/1_Confidence_1.000_Length_274  | GGCAATCTTGAAGTAGACCGAG<br>GTTGGTTAAAGGGTGTCTTCATT        | 58°C | 393                   |

(1) Product size obtained with primer pair 1

(2) Product size obtained with primer pair 2

**The bHLH transcription factor VfTT8 underlies *zt2*, the locus determining zero tannin content in faba bean (*Vicia faba* L.)**

Natalia Gutierrez<sup>1\*</sup>, CM Avila<sup>1</sup>, Ana M. Torres<sup>1</sup>

<sup>1</sup> Área de Genómica y Biotecnología, IFAPA-Centro Alameda del Obispo, Apdo 3092, E-14080 Córdoba, Spain.

\*Corresponding author e-mail: [natalia.gutierrez.leiva@juntadeandalucia.es](mailto:natalia.gutierrez.leiva@juntadeandalucia.es)

**Supplementary Table S3 Haplotype analysis of the markers flanking the gene *zt2* in three faba bean populations.** The allele for each phenotype (flower color) and for each gene maker is specified. The grey color indicates the misclassified individuals.

| Population                       | Phenotype<br>F3 family | Vf Mt1g072320 <sup>(2)</sup> |          | GLIP245SNP |           | Vf Mt1g072140 |     | Vf Mt7g100500 |     |
|----------------------------------|------------------------|------------------------------|----------|------------|-----------|---------------|-----|---------------|-----|
|                                  |                        |                              |          |            |           |               |     |               |     |
| MAYA_P1                          | wild type (A)          | T:T                          | T:T      | T:T        | T:T       | C:C           | C:C | C:C           | C:C |
| DISCO_P2                         | <i>zt2</i> (B)         | C:C                          | C:C      | C:C        | C:C       | A:A           | A:A | T:T           | T:T |
| 1                                | A                      | T:T                          | T:T      | T:T        | T:T       | C:C           | C:C | C:C           | C:C |
| 2                                | A                      | T:C                          | T:C      | T:C        | T:C       | C:A           | C:A | T:C           | T:C |
| 3                                | H                      | T:C                          | T:C      | T:C        | T:C       | C:A           | C:A | T:C           | T:C |
| 4                                | A                      | T:T                          | T:T      | T:T        | T:T       | C:C           | C:C | C:C           | C:C |
| 5                                | B                      | C:C                          | C:C      | C:C        | C:C       | A:A           | A:A | T:T           | T:T |
| 6                                | A                      | T:C                          | T:C      | T:C        | T:C       | C:A           | C:A | T:C           | T:C |
| 7                                | A                      | T:C                          | T:C      | T:C        | T:C       | C:A           | C:A | T:C           | T:C |
| 8                                | H                      | T:C                          | T:C      | T:C        | T:C       | C:A           | C:A | T:T           | T:T |
| 9                                | H                      | T:C                          | T:C      | T:C        | T:C       | C:A           | C:A | T:T           | T:T |
| 10                               | H                      | T:C                          | T:C      | T:C        | T:C       | C:A           | C:A | T:C           | T:C |
| 11                               | A                      | T:T                          | T:T      | T:T        | T:T       | C:C           | C:C | C:C           | C:C |
| 12                               | B                      | C:C                          | C:C      | C:C        | C:C       | A:A           | A:A | T:T           | T:T |
| 13                               | B                      | C:C                          | C:C      | C:C        | C:C       | A:A           | A:A | T:T           | T:T |
| 14                               | H                      | T:C                          | T:C      | T:C        | T:C       | C:A           | C:A | T:C           | T:C |
| 15                               | H                      | T:C                          | T:C      | T:C        | T:C       | C:A           | C:A | T:C           | T:C |
| 16                               | H                      | T:C                          | T:C      | T:C        | T:C       | C:A           | C:A | T:C           | T:C |
| 17                               | H                      | T:C                          | T:C      | T:C        | T:C       | C:A           | C:A | T:C           | T:C |
| 18                               | H                      | T:C                          | T:C      | T:C        | T:C       | C:A           | C:A | T:C           | T:C |
| 19                               | A                      | T:T                          | T:T      | T:T        | T:T       | C:C           | C:C | C:C           | C:C |
| 20                               | A                      | T:T                          | T:T      | T:T        | T:T       | C:C           | C:C | T:C           | T:C |
| 21                               | H                      | T:C                          | T:C      | T:C        | T:C       | A:A           | A:A | T:C           | T:C |
| 22                               | B                      | C:C                          | C:C      | C:C        | C:C       | A:A           | A:A | T:T           | T:T |
| 23                               | H                      | T:C                          | T:C      | T:C        | T:C       | C:A           | C:A | T:C           | T:C |
| 24                               | H                      | T:C                          | T:C      | T:C        | T:C       | C:A           | C:A | T:C           | T:C |
| 25                               | H                      | T:C                          | T:C      | T:C        | T:C       | C:A           | C:A | T:C           | T:C |
| 26                               | H                      | T:C                          | T:C      | T:C        | T:C       | C:A           | C:A | T:T           | T:T |
| 27                               | H                      | T:C                          | T:C      | T:C        | T:C       | C:A           | C:A | T:C           | T:C |
| 28                               | H                      | T:C                          | T:C      | T:C        | T:C       | C:A           | C:A | C:C           | C:C |
| 29                               | B                      | C:C                          | C:C      | C:C        | C:C       | C:A           | C:A | T:T           | T:T |
| 30                               | H                      | T:C                          | T:C      | T:C        | T:C       | C:A           | C:A | T:T           | T:T |
| 31                               | B                      | C:C                          | C:C      | C:C        | C:C       | A:A           | A:A | T:T           | T:T |
| 32                               | A                      | T:T                          | T:T      | T:T        | T:T       | C:A           | C:A | C:C           | C:C |
| 33                               | A                      | T:T                          | T:T      | T:T        | T:T       | C:A           | C:A | T:C           | T:C |
| 34                               | A                      | T:T                          | T:T      | T:T        | T:T       | C:A           | C:A | C:C           | C:C |
| 35                               | B                      | C:C                          | C:C      | C:C        | C:C       | A:A           | A:A | T:C           | T:C |
| 36                               | H                      | T:C                          | T:C      | T:C        | T:C       | C:A           | C:A | T:C           | T:C |
| 37                               | H                      | T:C                          | T:C      | T:C        | T:C       | C:A           | C:A | T:C           | T:C |
| 38                               | H                      | T:C                          | T:C      | T:C        | T:C       | C:A           | C:A | C:C           | C:C |
| 39                               | H                      | T:C                          | T:C      | T:C        | T:C       | C:A           | C:A | T:T           | T:T |
| 40                               | H                      | T:C                          | T:C      | T:C        | T:C       | C:A           | C:A | T:C           | T:C |
| 41                               | H                      | T:C                          | T:C      | T:C        | T:C       | C:A           | C:A | T:T           | T:T |
| 42                               | H                      | T:C                          | T:C      | T:C        | T:C       | C:A           | C:A | T:C           | T:C |
| 43                               | H                      | T:C                          | T:C      | T:C        | T:C       | C:A           | C:A | T:T           | T:T |
| 44                               | H                      | T:C                          | T:C      | T:C        | T:C       | C:A           | C:A | T:C           | T:C |
| 45                               | H                      | T:C                          | T:C      | T:C        | T:C       | A:A           | A:A | T:C           | T:C |
| 46                               | H                      | T:C                          | T:C      | T:C        | T:C       | C:A           | C:A | T:C           | T:C |
| 47                               | A                      | T:T                          | T:T      | T:T        | T:T       | C:C           | C:C | T:T           | T:T |
| 48                               | H                      | T:C                          | T:C      | T:C        | T:C       | C:A           | C:A | T:C           | T:C |
| 49                               | B                      | C:C                          | C:C      | C:C        | C:C       | A:A           | A:A | T:T           | T:T |
| 50                               | H                      | T:C                          | T:C      | T:C        | T:C       | C:A           | C:A | C:C           | C:C |
| <b>Misclassified individual:</b> |                        | <b>3</b>                     | <b>5</b> | <b>9</b>   | <b>17</b> |               |     |               |     |

| Population                       | Phenotype<br>F3 family | Vf Mt1g072320 <sup>(1)</sup> | Vf Mt1g072530 | GLPSNP   | Vf Mt7g100500 |
|----------------------------------|------------------------|------------------------------|---------------|----------|---------------|
| WIZARD_P1                        | wild type (A)          | A:A                          | A:A           | G:G      | C:C           |
| DISCO_P2                         | zt2 (B)                | G:G                          | C:C           | C:C      | T:T           |
| 1                                | A                      | A:A                          | A:A           | G:G      | C:C           |
| 2                                | H                      | G:A                          | C:A           | G:C      | T:C           |
| 3                                | H                      | G:A                          | C:A           | G:C      | T:C           |
| 4                                | H                      | G:A                          | C:A           | G:C      | T:C           |
| 5                                | A                      | A:A                          | A:A           | G:G      | C:C           |
| 6                                | H                      | G:A                          | C:A           | G:C      | T:C           |
| 7                                | B                      | G:G                          | C:A           | C:C      | T:T           |
| 8                                | A                      | A:A                          | C:A           | G:G      | T:C           |
| 9                                | A                      | A:A                          | A:A           | G:G      | C:C           |
| 10                               | A                      | A:A                          | A:A           | G:C      | T:C           |
| 11                               | B                      | G:G                          | C:C           | G:C      | T:C           |
| 12                               | H                      | G:A                          | C:A           | G:C      | T:C           |
| 13                               | H                      | G:A                          | C:A           | C:C      | T:C           |
| 14                               | H                      | G:A                          | C:A           | G:C      | T:C           |
| 15                               | A                      | A:A                          | A:A           | G:G      | C:C           |
| 16                               | B                      | G:G                          | C:C           | C:C      | T:T           |
| 17                               | H                      | G:A                          | C:A           | G:C      | C:C           |
| 18                               | H                      | G:A                          | C:A           | G:C      | T:C           |
| 19                               | A                      | G:A                          | C:A           | C:C      | C:C           |
| 20                               | A                      | A:A                          | A:A           | G:C      | C:C           |
| 21                               | B                      | G:G                          | C:C           | G:C      | T:T           |
| 22                               | B                      | G:G                          | C:C           | C:C      | T:T           |
| 23                               | B                      | G:G                          | C:C           | C:C      | T:T           |
| 24                               | H                      | G:A                          | C:A           | G:C      | T:C           |
| 25                               | A                      | A:A                          | A:A           | G:G      | C:C           |
| 26                               | A                      | A:A                          | A:A           | G:G      | C:C           |
| 27                               | H                      | G:A                          | C:A           | G:C      | T:C           |
| 28                               | B                      | G:G                          | C:C           | C:C      | T:T           |
| 29                               | H                      | G:A                          | C:A           | G:C      | T:C           |
| 30                               | H                      | G:A                          | C:A           | G:C      | T:T           |
| 31                               | H                      | G:A                          | C:A           | G:C      | T:C           |
| 32                               | H                      | G:A                          | C:A           | G:C      | T:C           |
| 33                               | A                      | A:A                          | A:A           | G:C      | C:C           |
| 34                               | H                      | G:A                          | C:A           | G:C      | T:C           |
| 35                               | A                      | G:A                          | C:A           | G:C      | T:T           |
| 36                               | H                      | G:A                          | C:A           | G:C      | T:C           |
| 37                               | B                      | G:G                          | C:C           | C:C      | T:T           |
| 38                               | A                      | A:A                          | A:A           | G:G      | C:C           |
| 39                               | H                      | G:A                          | C:A           | G:C      | T:C           |
| 40                               | A                      | A:A                          | A:A           | G:C      | T:C           |
| 41                               | H                      | G:A                          | C:A           | G:C      | T:C           |
| 42                               | H                      | G:A                          | C:A           | G:C      | T:C           |
| 43                               | B                      | G:G                          | C:C           | C:C      | T:T           |
| 44                               | B                      | G:G                          | C:C           | C:C      | T:T           |
| 45                               | H                      | G:A                          | C:A           | G:C      | T:C           |
| 46                               | A                      | A:A                          | A:A           | G:G      | T:C           |
| 47                               | H                      | G:A                          | ?             | G:C      | T:T           |
| 48                               | A                      | A:A                          | A:A           | G:G      | C:C           |
| 49                               | A                      | A:A                          | A:A           | G:G      | C:C           |
| 50                               | A                      | A:A                          | A:A           | G:G      | T:T           |
| 51                               | B                      | G:G                          | C:C           | C:C      | T:T           |
| 52                               | B                      | G:G                          | C:C           | C:C      | T:T           |
| 53                               | H                      | G:A                          | C:A           | G:C      | T:C           |
| 54                               | B                      | G:G                          | C:C           | C:C      | T:T           |
| 55                               | H                      | G:A                          | C:A           | G:C      | T:C           |
| 56                               | B                      | G:G                          | C:A           | C:C      | T:T           |
| <b>Misclassified individuals</b> |                        | <b>2</b>                     | <b>6</b>      | <b>9</b> | <b>10</b>     |

|                                  | Phenotype                    | Vf Mt1g072320 <sup>(1)</sup> | Vf Mt1g072530 | Vf Mt1g077640 | Vf Mt7g100500 |
|----------------------------------|------------------------------|------------------------------|---------------|---------------|---------------|
| VF6_P1                           | RIL individual wild type (A) | A:A                          | C:C           | A:A           | C:C           |
| ZT2_P2                           | zt2 (B)                      | G:G                          | G:G           | G:G           | T:T           |
| 1                                | A                            | A:A                          | C:C           | A:A           | C:C           |
| 2                                | B                            | G:G                          | G:G           | G:G           | T:T           |
| 3                                | A                            | A:A                          | C:C           | A:A           | C:C           |
| 4                                | A                            | A:A                          | C:C           | A:A           | T:T           |
| 5                                | B                            | G:G                          | G:G           | G:G           | T:T           |
| 6                                | A                            | A:A                          | C:C           | A:A           | C:C           |
| 7                                | B                            | G:G                          | G:G           | A:A           | T:T           |
| 8                                | B                            | G:G                          | G:G           | G:G           | T:T           |
| 9                                | A                            | A:A                          | C:C           | A:A           | C:C           |
| 10                               | A                            | A:A                          | C:C           | G:G           | C:C           |
| 11                               | A                            | A:A                          | C:C           | A:A           | C:C           |
| 12                               | A                            | A:A                          | C:C           | A:A           | C:C           |
| 13                               | B                            | G:G                          | G:G           | G:G           | C:C           |
| 14                               | A                            | A:A                          | G:C           | G:G           | T:T           |
| 15                               | A                            | A:A                          | C:C           | A:A           | T:T           |
| 16                               | A                            | A:A                          | C:C           | A:A           | C:C           |
| 17                               | B                            | G:G                          | G:G           | G:G           | T:T           |
| 18                               | A                            | A:A                          | C:C           | A:A           | C:C           |
| 19                               | A                            | A:A                          | C:C           | A:A           | C:C           |
| 20                               | B                            | G:G                          | G:G           | A:A           | T:T           |
| 21                               | A                            | A:A                          | C:C           | G:G           | C:C           |
| 22                               | B                            | G:G                          | G:G           | G:G           | C:C           |
| 23                               | B                            | G:G                          | ?             | G:G           | ?             |
| 24                               | A                            | A:A                          | C:C           | A:A           | T:T           |
| 25                               | A                            | G:A                          | G:C           | A:A           | C:C           |
| 26                               | A                            | G:A                          | C:C           | G:G           | C:C           |
| 27                               | B                            | G:G                          | G:G           | G:G           | T:T           |
| 28                               | B                            | G:G                          | G:G           | A:A           | T:T           |
| 29                               | A                            | A:A                          | C:C           | A:A           | C:C           |
| 30                               | A                            | A:A                          | C:C           | A:A           | C:C           |
| 31                               | A                            | A:A                          | C:C           | A:A           | T:C           |
| 32                               | A                            | A:A                          | C:C           | A:A           | T:T           |
| 33                               | B                            | G:G                          | G:G           | G:G           | T:T           |
| 34                               | A                            | A:A                          | C:C           | A:A           | C:C           |
| 35                               | A                            | A:A                          | C:C           | A:A           | C:C           |
| 36                               | A                            | A:A                          | C:C           | A:A           | C:C           |
| 37                               | A                            | A:A                          | C:C           | A:A           | C:C           |
| 38                               | A                            | A:A                          | C:C           | A:A           | T:C           |
| 39                               | A                            | A:A                          | G:C           | A:A           | T:C           |
| 40                               | B                            | G:G                          | G:G           | G:G           | T:C           |
| 41                               | B                            | G:G                          | G:G           | G:G           | C:C           |
| 42                               | B                            | G:G                          | G:G           | G:G           | T:T           |
| 43                               | A                            | A:A                          | C:C           | A:A           | C:C           |
| 44                               | A                            | A:A                          | G:C           | A:A           | T:C           |
| 45                               | A                            | A:A                          | C:C           | A:A           | C:C           |
| 46                               | A                            | A:A                          | C:C           | A:A           | C:C           |
| 47                               | A                            | A:A                          | C:C           | A:A           | C:C           |
| 48                               | B                            | G:G                          | G:G           | G:G           | C:C           |
| 49                               | B                            | G:G                          | G:G           | G:G           | C:C           |
| 50                               | B                            | G:G                          | G:G           | A:A           | C:C           |
| 51                               | A                            | A:A                          | C:C           | A:A           | C:C           |
| 52                               | B                            | G:G                          | G:G           | G:G           | T:T           |
| 53                               | A                            | A:A                          | C:C           | G:G           | T:C           |
| 54                               | B                            | G:G                          | G:G           | G:G           | T:T           |
| 55                               | A                            | A:A                          | C:C           | A:A           | C:C           |
| 56                               | B                            | G:G                          | G:G           | G:G           | T:T           |
| 57                               | B                            | G:G                          | G:G           | G:G           | T:T           |
| 58                               | B                            | G:G                          | G:G           | G:G           | T:C           |
| 59                               | B                            | G:G                          | G:G           | G:G           | T:T           |
| 60                               | B                            | G:G                          | G:G           | G:G           | T:T           |
| 61                               | A                            | A:A                          | C:C           | A:A           | T:C           |
| 62                               | B                            | G:G                          | G:G           | G:G           | T:T           |
| <b>Misclassified individuals</b> |                              | <b>2</b>                     | <b>5</b>      | <b>8</b>      | <b>20</b>     |
